# Supplementary material for: Pseudouridine-modified tRNA fragments repress aberrant protein synthesis and predict leukaemic progression in myelodysplastic syndrome
Source: PubMed Central journal article supplement (PMC8924001; doi:10.1038/s41556-022-00852-9), 2022-03-15

### Related to Figure 3

#### Related to Figure 3d

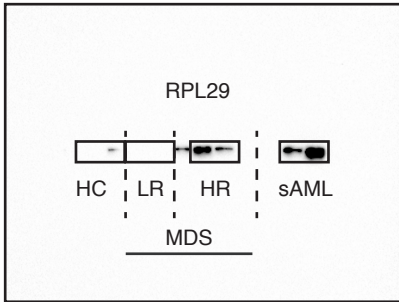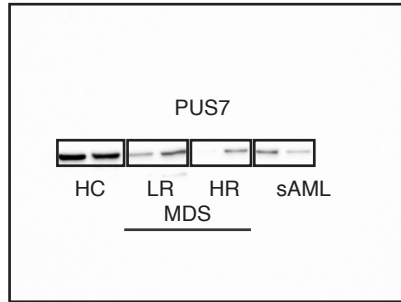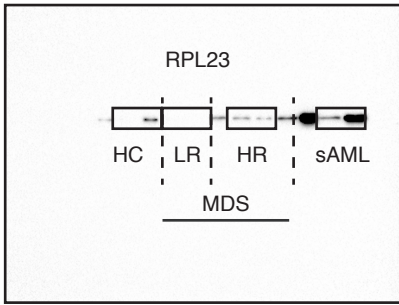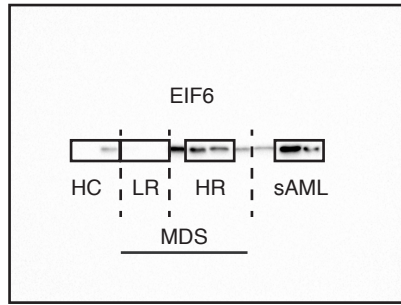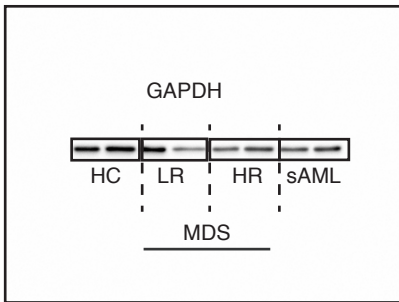

#### Related to Figure 3e

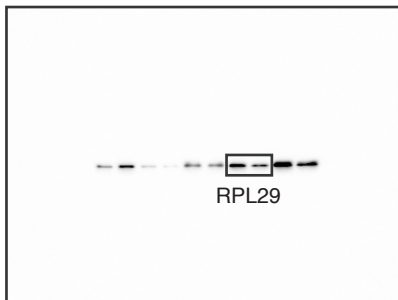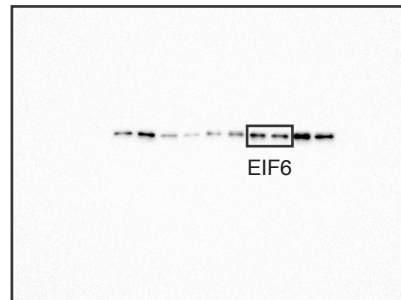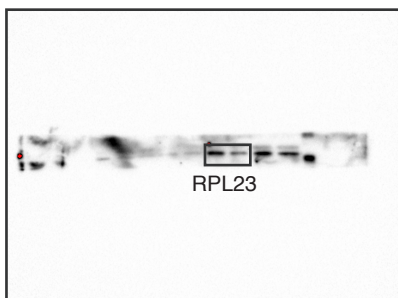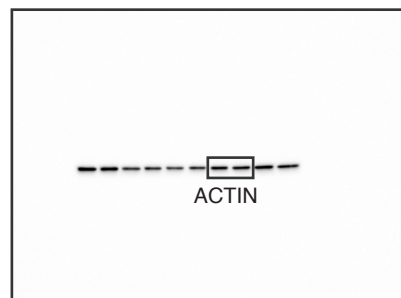

### Related to Figure 3

### Related to Figure 3f

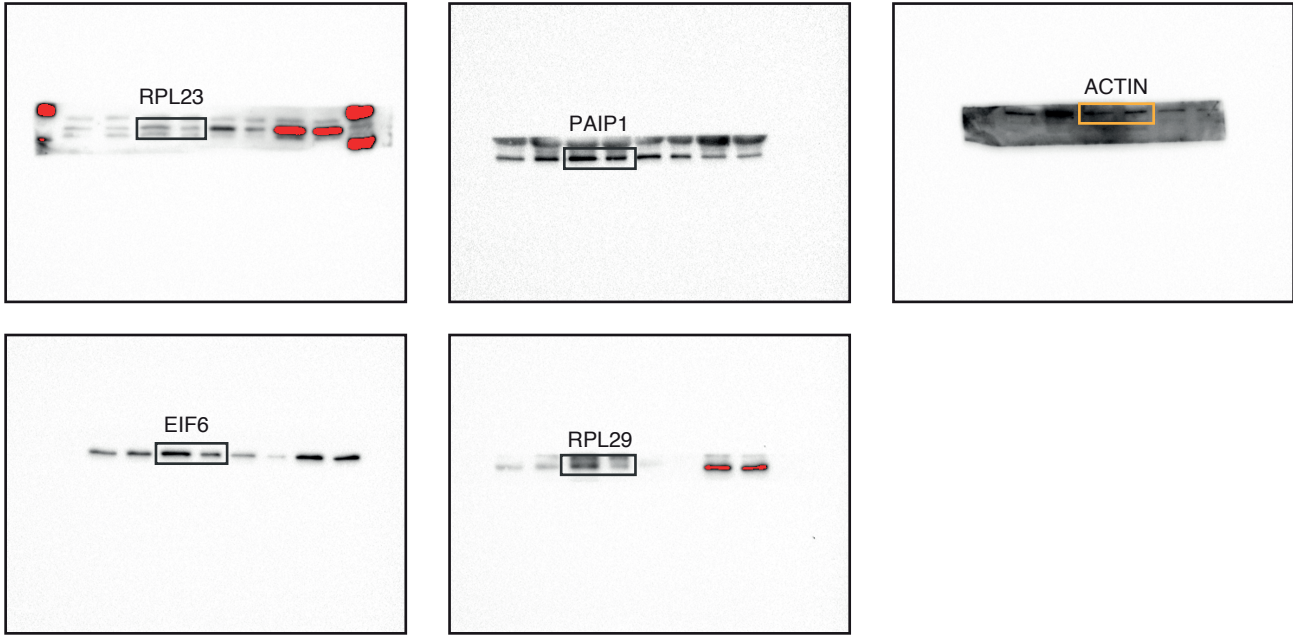

### Related to Figure 3g

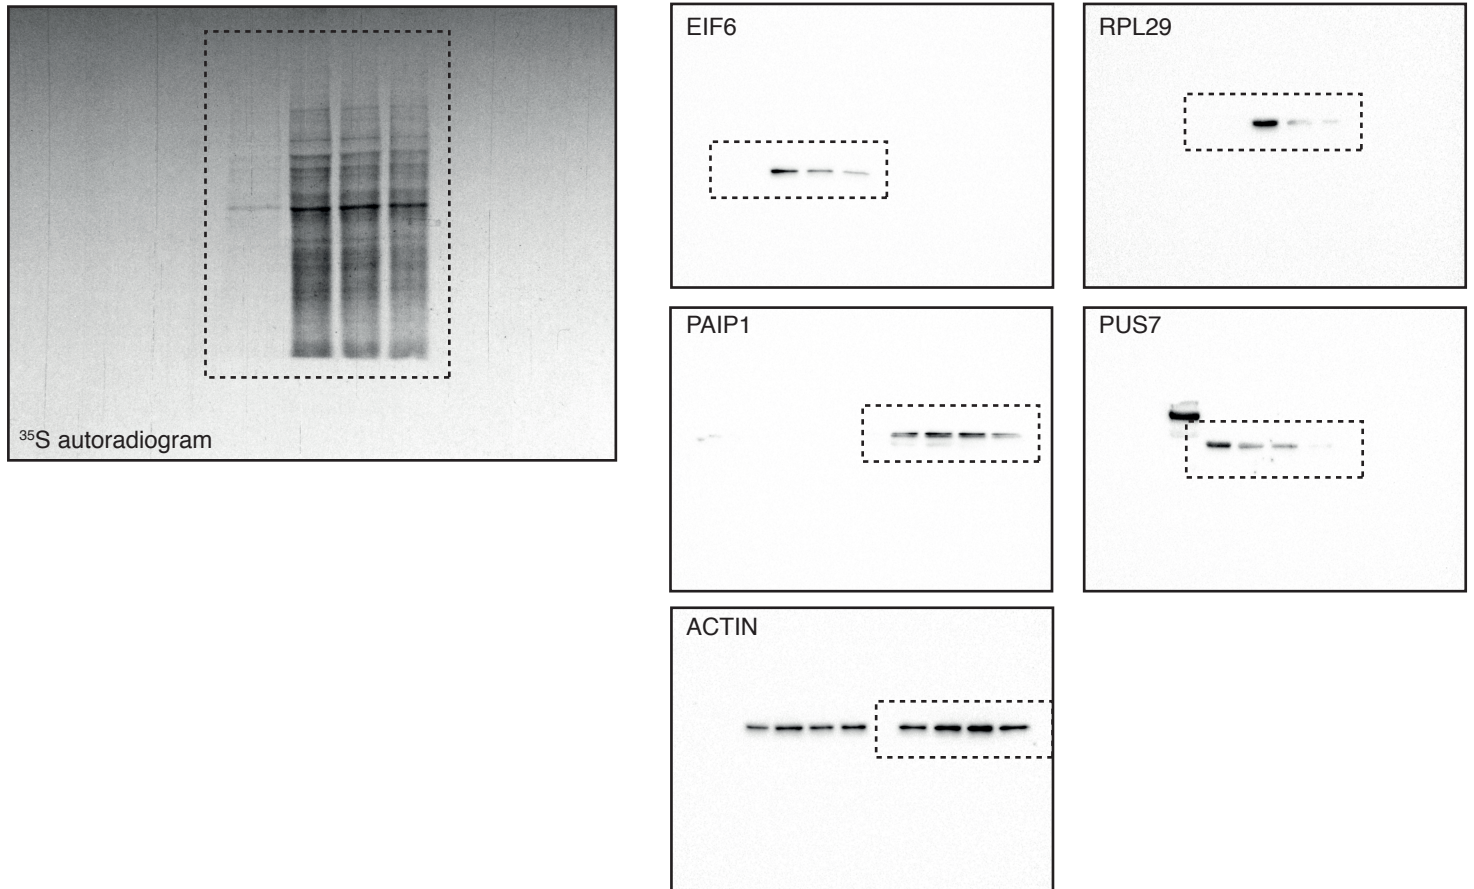

Supplement: 41556_2022_852_MOESM9_ESM.pdf [file 41556_2022_852_MOESM9_ESM.pdf]
